# Supplementary material for: Chemosensory Perception of Predators by Larval Amphibians Depends on Water Quality
Source: PubMed Central journal article supplement (PMC4482611; doi:10.1371/journal.pone.0131516), 2015-06-26
Supplement: pone.0131516.s001.pdf [file pone.0131516.s001.pdf]

S1 Table. Raw data yielded by experiments. For water source, wastew = treated wastewater effluent, river = river water, and tapw = tap water. For predator, no = tapwater control cues, and yes = dragonfly cues. Each assay involved 24 independent wash tubs, and the assay was repeated on four dates, as shown. Act\_before = activity before cue addition (mean # moving per 20 seconds), averaged across 200 seconds of observation. Act\_after = activity after cue addition (mean # moving per 20 seconds), averaged across 10 minutes of observation. T\_before =  $\log(x + 0.1)$  transformed activity before, and T\_after =  $\log(x + 0.1)$  transformed activity after.

| Water Source | Predator | Date   | Act_before | Act_after | T_before | T_after |
|--------------|----------|--------|------------|-----------|----------|---------|
| wastew       | No       | 10-Jun | 0.5250     | 0.2917    | -0.2041  | -0.4071 |
| wastew       | No       | 10-Jun | 0.6000     | 0.5667    | -0.1549  | -0.1761 |
| wastew       | No       | 10-Jun | 0.2000     | 0.2667    | -0.5229  | -0.4357 |
| wastew       | No       | 10-Jun | 0.2000     | 0.2000    | -0.5229  | -0.5229 |
| wastew       | Yes      | 10-Jun | 0.2400     | 0.2600    | -0.4685  | -0.4437 |
| wastew       | Yes      | 10-Jun | 0.0200     | 0.0267    | -0.9208  | -0.8973 |
| wastew       | Yes      | 10-Jun | 0.4000     | 0.1750    | -0.3010  | -0.5607 |
| wastew       | Yes      | 10-Jun | 0.2500     | 0.1417    | -0.4559  | -0.6168 |
| river        | No       | 10-Jun | 0.2250     | 0.2083    | -0.4881  | -0.5110 |
| river        | No       | 10-Jun | 0.2667     | 0.6000    | -0.4357  | -0.1549 |
| river        | No       | 10-Jun | 0.4800     | 0.6533    | -0.2366  | -0.1230 |
| river        | No       | 10-Jun | 0.1750     | 0.2750    | -0.5607  | -0.4260 |
| river        | Yes      | 10-Jun | 0.2750     | 0.2333    | -0.4260  | -0.4771 |
| river        | Yes      | 10-Jun | 0.3000     | 0.3167    | -0.3979  | -0.3802 |
| river        | Yes      | 10-Jun | 0.2250     | 0.2167    | -0.4881  | -0.4994 |
| river        | Yes      | 10-Jun | 0.1750     | 0.3583    | -0.5607  | -0.3388 |
| tapw         | No       | 10-Jun | 0.2333     | 0.2333    | -0.4771  | -0.4771 |
| tapw         | No       | 10-Jun | 0.0800     | 0.2400    | -0.7447  | -0.4685 |
| tapw         | No       | 10-Jun | 0.4750     | 0.5417    | -0.2403  | -0.1927 |
| tapw         | No       | 10-Jun | 0.3000     | 0.3600    | -0.3979  | -0.3372 |
| tapw         | Yes      | 10-Jun | 0.2800     | 0.0333    | -0.4202  | -0.8751 |
| tapw         | Yes      | 10-Jun | 0.1750     | 0.0917    | -0.5607  | -0.7175 |
| tapw         | Yes      | 10-Jun | 0.1000     | 0.1083    | -0.6990  | -0.6812 |
| tapw         | Yes      | 10-Jun | 0.1000     | 0.1667    | -0.6990  | -0.5740 |
| wastew       | No       | 15-Jun | 0.0000     | 0.1867    | -1.0000  | -0.5426 |
| wastew       | No       | 15-Jun | 0.1000     | 0.1800    | -0.6990  | -0.5528 |
| wastew       | No       | 15-Jun | 0.0600     | 0.2533    | -0.7959  | -0.4518 |
| wastew       | No       | 15-Jun | 0.2600     | 0.4467    | -0.4437  | -0.2623 |
| wastew       | Yes      | 15-Jun | 0.0200     | 0.0733    | -0.9208  | -0.7611 |
| wastew       | Yes      | 15-Jun | 0.0750     | 0.2833    | -0.7570  | -0.4164 |
| wastew       | Yes      | 15-Jun | 0.0200     | 0.2333    | -0.9208  | -0.4771 |
| wastew       | Yes      | 15-Jun | 0.2800     | 0.3467    | -0.4202  | -0.3500 |
| river        | No       | 15-Jun | 0.1000     | 0.3133    | -0.6990  | -0.3837 |

|        |     |        |        |        |         |         |
|--------|-----|--------|--------|--------|---------|---------|
| river  | No  | 15-Jun | 0.0400 | 0.0933 | -0.8539 | -0.7137 |
| river  | No  | 15-Jun | 0.0400 | 0.2467 | -0.8539 | -0.4601 |
| river  | No  | 15-Jun | 0.3000 | 0.3667 | -0.3979 | -0.3310 |
| river  | Yes | 15-Jun | 0.0000 | 0.1167 | -1.0000 | -0.6642 |
| river  | Yes | 15-Jun | 0.1000 | 0.1333 | -0.6990 | -0.6320 |
| river  | Yes | 15-Jun | 0.1000 | 0.1667 | -0.6990 | -0.5740 |
| river  | Yes | 15-Jun | 0.0200 | 0.1133 | -0.9208 | -0.6709 |
| tapw   | No  | 15-Jun | 0.1400 | 0.5067 | -0.6198 | -0.2170 |
| tapw   | No  | 15-Jun | 0.1000 | 0.1867 | -0.6990 | -0.5426 |
| tapw   | No  | 15-Jun | 0.2600 | 0.4667 | -0.4437 | -0.2467 |
| tapw   | No  | 15-Jun | 0.2750 | 0.3750 | -0.4260 | -0.3233 |
| tapw   | Yes | 15-Jun | 0.1400 | 0.0733 | -0.6198 | -0.7611 |
| tapw   | Yes | 15-Jun | 0.2200 | 0.2200 | -0.4949 | -0.4949 |
| tapw   | Yes | 15-Jun | 0.1800 | 0.1333 | -0.5528 | -0.6320 |
| tapw   | Yes | 15-Jun | 0.3400 | 0.3467 | -0.3565 | -0.3500 |
| wastew | No  | 23-Jun | 0.2250 | 0.2667 | -0.4881 | -0.4357 |
| wastew | No  | 23-Jun | 0.3000 | 0.3667 | -0.3979 | -0.3310 |
| wastew | No  | 23-Jun | 0.3600 | 0.2133 | -0.3372 | -0.5040 |
| wastew | No  | 23-Jun | 0.1800 | 0.2667 | -0.5528 | -0.4357 |
| wastew | Yes | 23-Jun | 0.0400 | 0.1200 | -0.8539 | -0.6576 |
| wastew | Yes | 23-Jun | 0.1200 | 0.1933 | -0.6576 | -0.5326 |
| wastew | Yes | 23-Jun | 0.3200 | 0.2800 | -0.3768 | -0.4202 |
| wastew | Yes | 23-Jun | 0.1200 | 0.1467 | -0.6576 | -0.6079 |
| river  | No  | 23-Jun | 0.0800 | 0.2267 | -0.7447 | -0.4859 |
| river  | No  | 23-Jun | 0.0800 | 0.3000 | -0.7447 | -0.3979 |
| river  | No  | 23-Jun | 0.1000 | 0.1417 | -0.6990 | -0.6168 |
| river  | No  | 23-Jun | 0.2800 | 0.3267 | -0.4202 | -0.3699 |
| river  | Yes | 23-Jun | 0.1600 | 0.4667 | -0.5850 | -0.2467 |
| river  | Yes | 23-Jun | 0.0750 | 0.1417 | -0.7570 | -0.6168 |
| river  | Yes | 23-Jun | 0.3200 | 0.1467 | -0.3768 | -0.6079 |
| river  | Yes | 23-Jun | 0.1250 | 0.2917 | -0.6478 | -0.4071 |
| tapw   | No  | 23-Jun | 0.1200 | 0.2733 | -0.6576 | -0.4279 |
| tapw   | No  | 23-Jun | 0.4400 | 0.5133 | -0.2676 | -0.2123 |
| tapw   | No  | 23-Jun | 0.1800 | 0.2733 | -0.5528 | -0.4279 |
| tapw   | No  | 23-Jun | 0.2000 | 0.2467 | -0.5229 | -0.4601 |
| tapw   | Yes | 23-Jun | 0.1200 | 0.0467 | -0.6576 | -0.8337 |
| tapw   | Yes | 23-Jun | 0.2500 | 0.1250 | -0.4559 | -0.6478 |
| tapw   | Yes | 23-Jun | 0.2200 | 0.1933 | -0.4949 | -0.5326 |
| tapw   | Yes | 23-Jun | 0.1000 | 0.2400 | -0.6990 | -0.4685 |
| wastew | No  | 25-Jun | 0.1200 | 0.1000 | -0.6576 | -0.6990 |
| wastew | No  | 25-Jun | 0.1400 | 0.2267 | -0.6198 | -0.4859 |
| wastew | No  | 25-Jun | 0.1200 | 0.3333 | -0.6576 | -0.3632 |
| wastew | No  | 25-Jun | 0.2800 | 0.3000 | -0.4202 | -0.3979 |
| wastew | Yes | 25-Jun | 0.0800 | 0.0533 | -0.7447 | -0.8144 |
| wastew | Yes | 25-Jun | 0.0800 | 0.0533 | -0.7447 | -0.8144 |
| wastew | Yes | 25-Jun | 0.5400 | 0.6200 | -0.1938 | -0.1427 |
| wastew | Yes | 25-Jun | 0.3800 | 0.2867 | -0.3188 | -0.4127 |

|       |     |        |        |        |         |         |
|-------|-----|--------|--------|--------|---------|---------|
| river | No  | 25-Jun | 0.3200 | 0.4267 | -0.3768 | -0.2785 |
| river | No  | 25-Jun | 0.3600 | 0.3400 | -0.3372 | -0.3565 |
| river | No  | 25-Jun | 0.3800 | 0.5733 | -0.3188 | -0.1718 |
| river | No  | 25-Jun | 0.2400 | 0.4667 | -0.4685 | -0.2467 |
| river | Yes | 25-Jun | 0.1800 | 0.2933 | -0.5528 | -0.4052 |
| river | Yes | 25-Jun | 0.2200 | 0.3600 | -0.4949 | -0.3372 |
| river | Yes | 25-Jun | 0.2800 | 0.2867 | -0.4202 | -0.4127 |
| river | Yes | 25-Jun | 0.2000 | 0.3067 | -0.5229 | -0.3908 |
| tapw  | No  | 25-Jun | 0.1400 | 0.2200 | -0.6198 | -0.4949 |
| tapw  | No  | 25-Jun | 0.2000 | 0.4000 | -0.5229 | -0.3010 |
| tapw  | No  | 25-Jun | 0.3400 | 0.6400 | -0.3565 | -0.1308 |
| tapw  | No  | 25-Jun | 0.0800 | 0.3067 | -0.7447 | -0.3908 |
| tapw  | Yes | 25-Jun | 0.2400 | 0.1733 | -0.4685 | -0.5633 |
| tapw  | Yes | 25-Jun | 0.1400 | 0.2800 | -0.6198 | -0.4202 |
| tapw  | Yes | 25-Jun | 0.4000 | 0.2800 | -0.3010 | -0.4202 |
| tapw  | Yes | 25-Jun | 0.1600 | 0.4600 | -0.5850 | -0.2518 |
